# Supplementary material
Source: PubMed Central journal article supplement (PMC3680534)

## **Supplemental Material to:**

**George I. Lambrou, Maria Adamaki, Dimitris Delakas,  
Demetrios A. Spandidos, Spyros Vlahopoulos and  
Apostolos Zaravinos**

**Gene expression is highly correlated on the chromosome  
level in urinary bladder cancer**

**2013; 12(10)**

**<http://dx.doi.org/10.4161/cc.24673>**

**<http://www.landesbioscience.com/journals/cc/article/24673>**

Suppl. Figure 1.

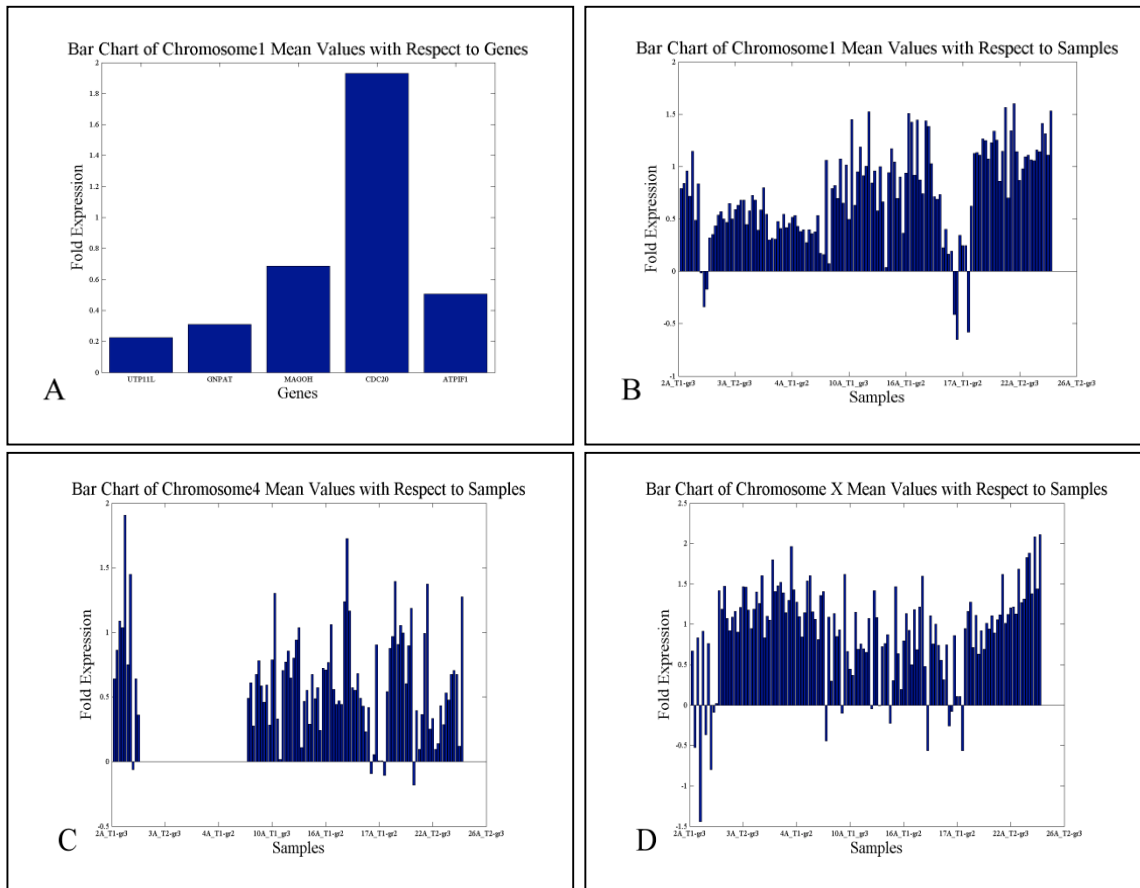

Suppl. Figure 2.

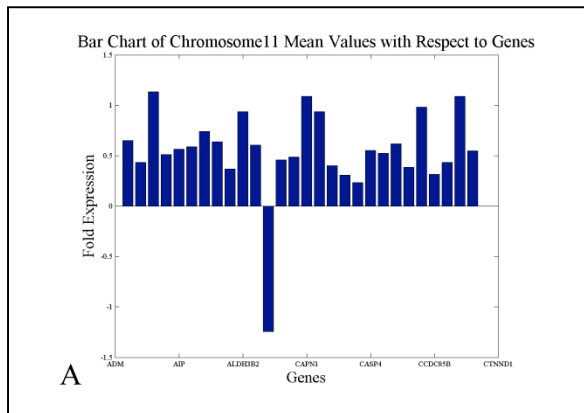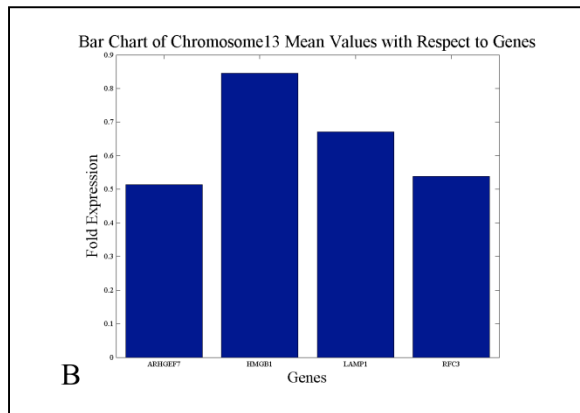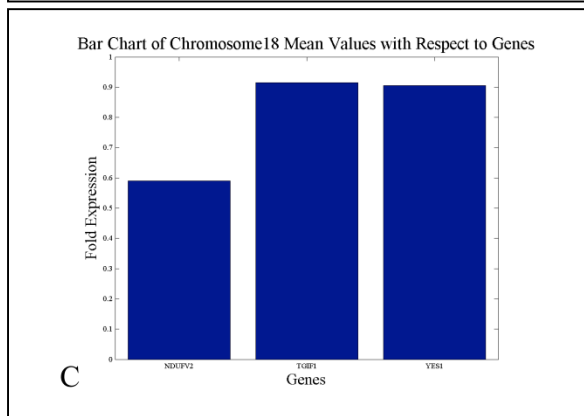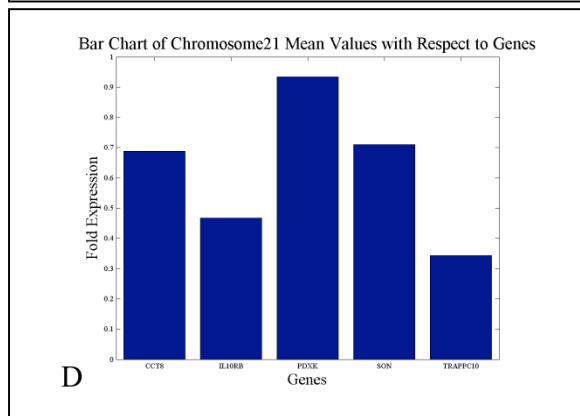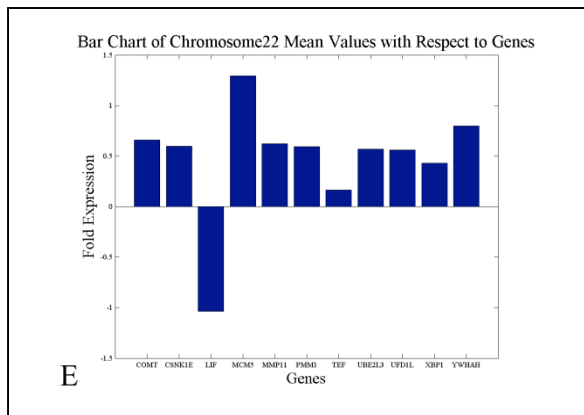

Suppl. Fig. 3

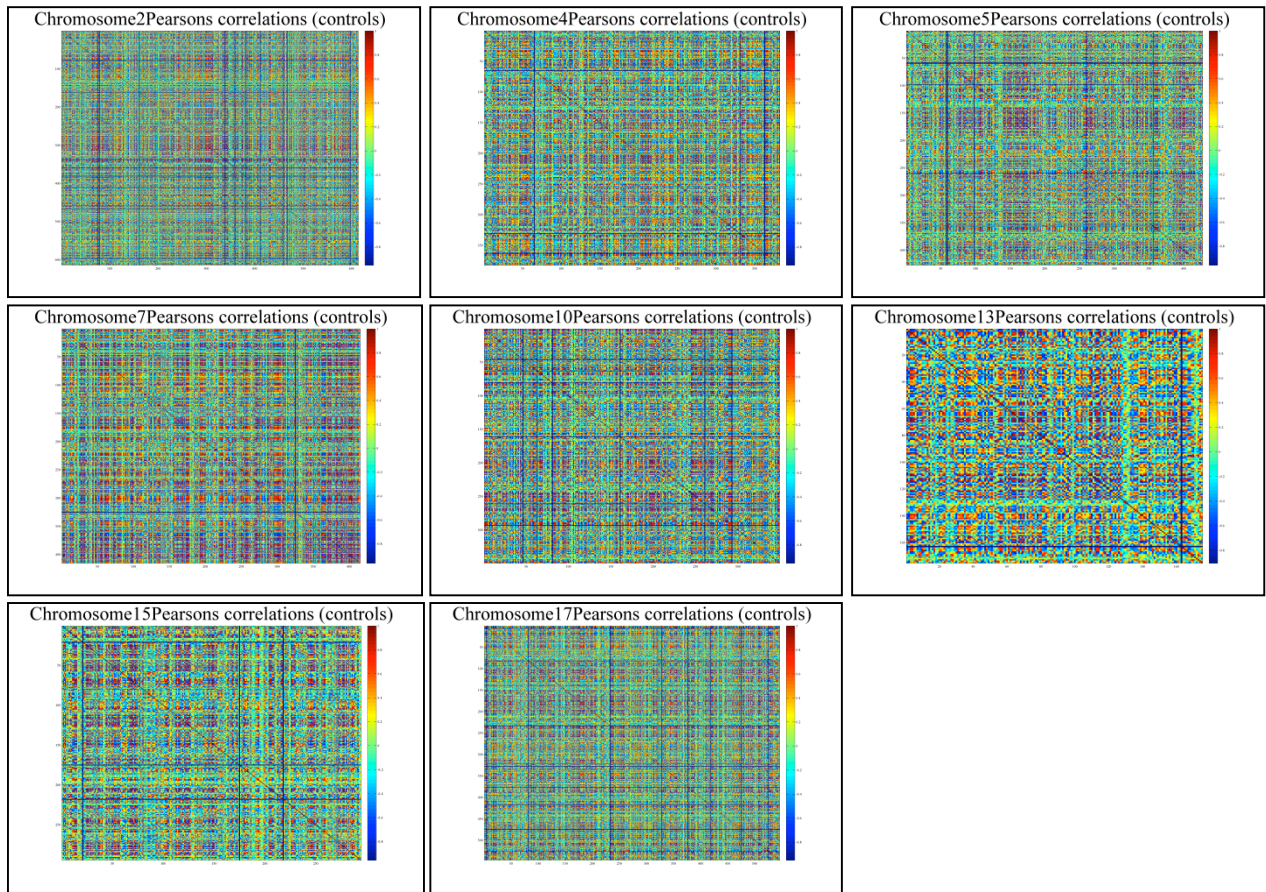

Suppl. Fig. 4

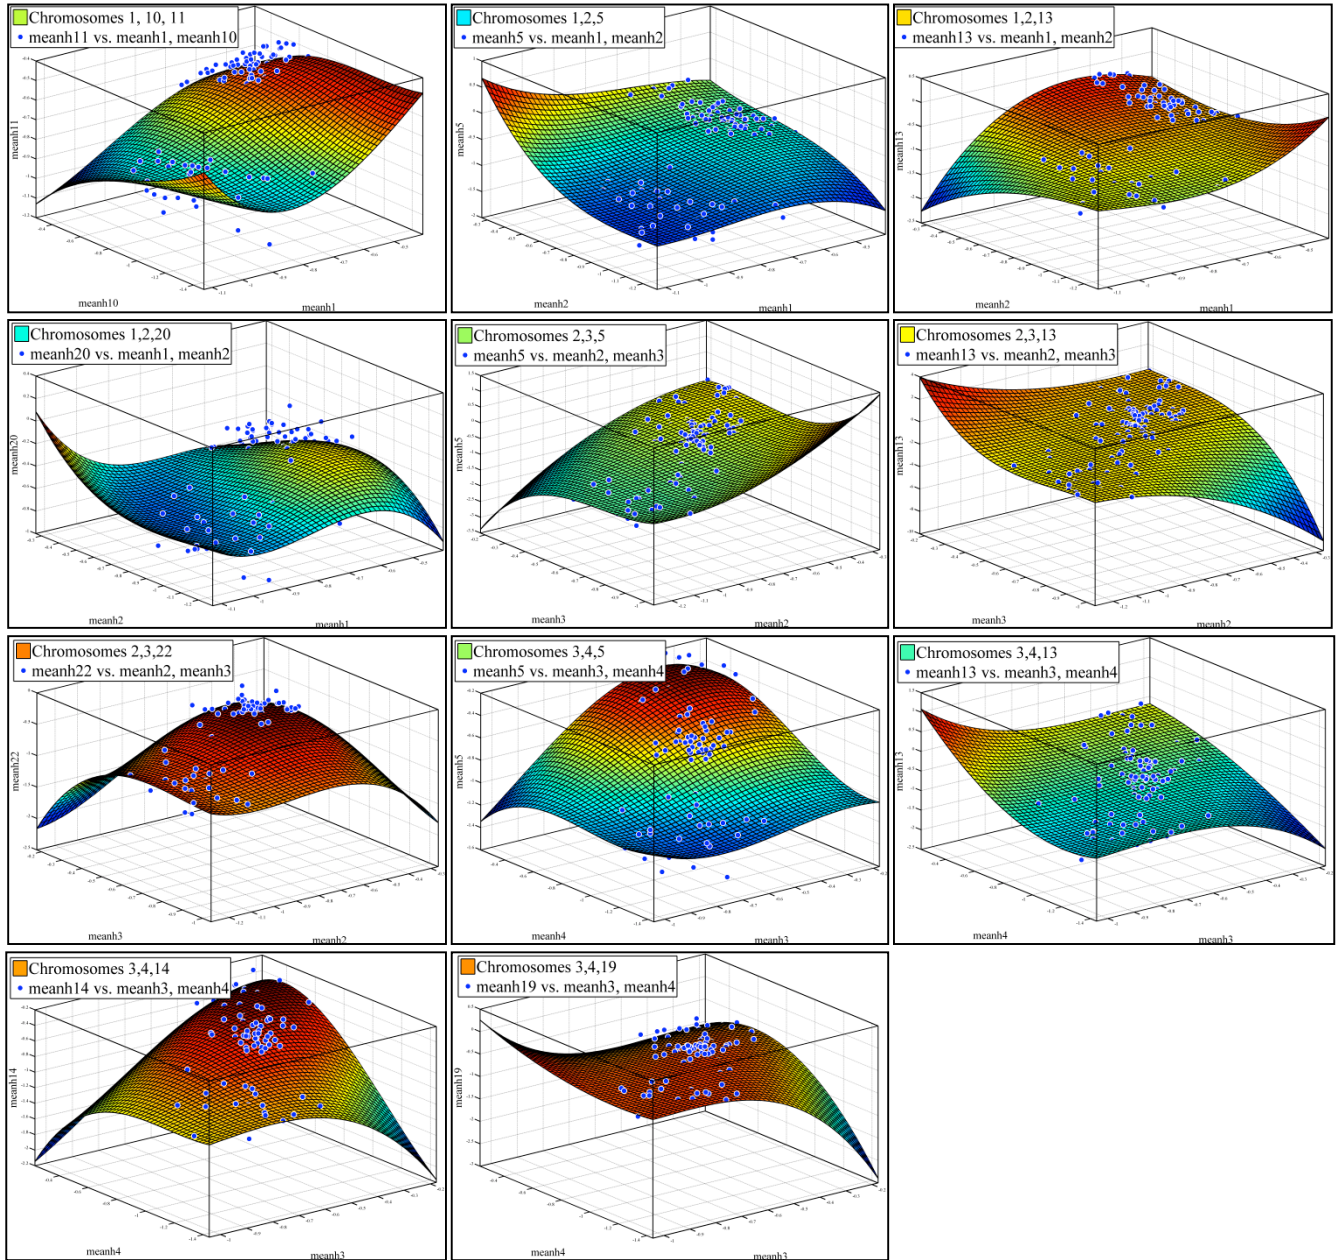



Suppl. Fig. 5

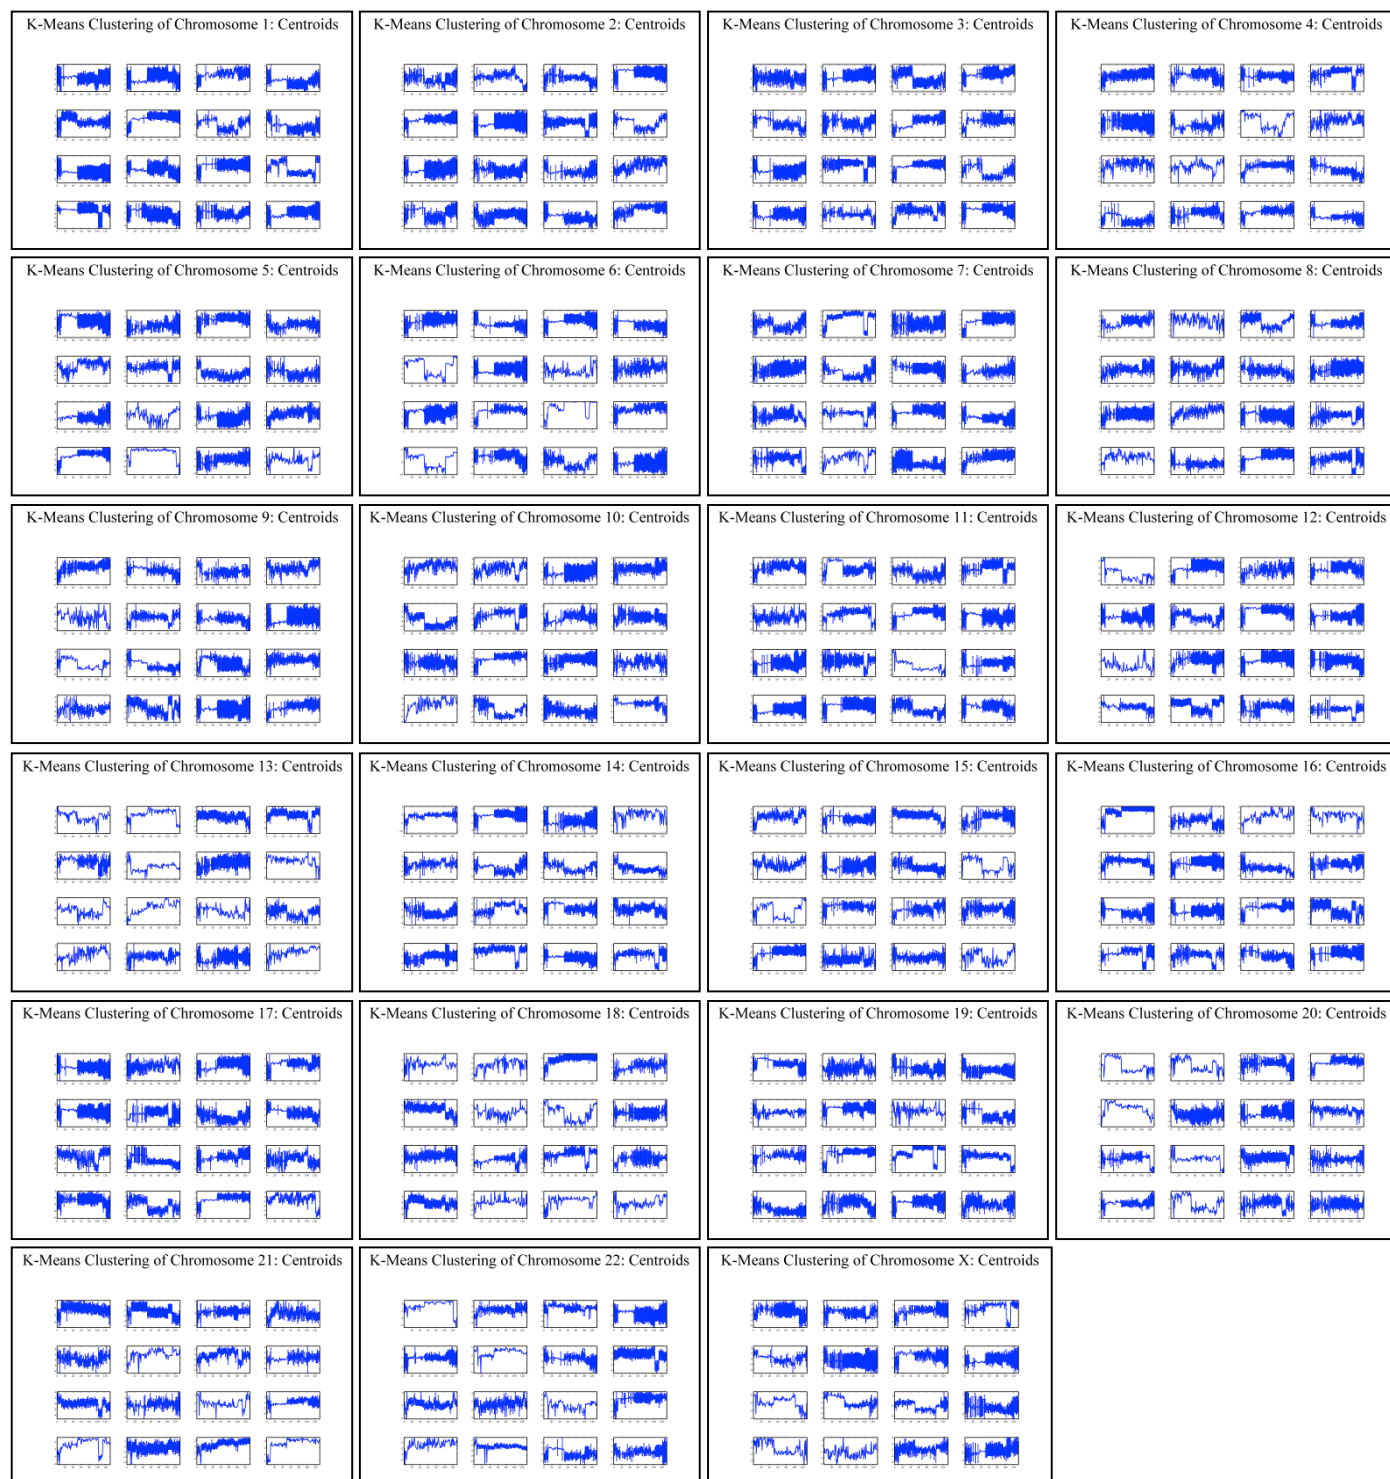

Suppl. Fig. 6

A)

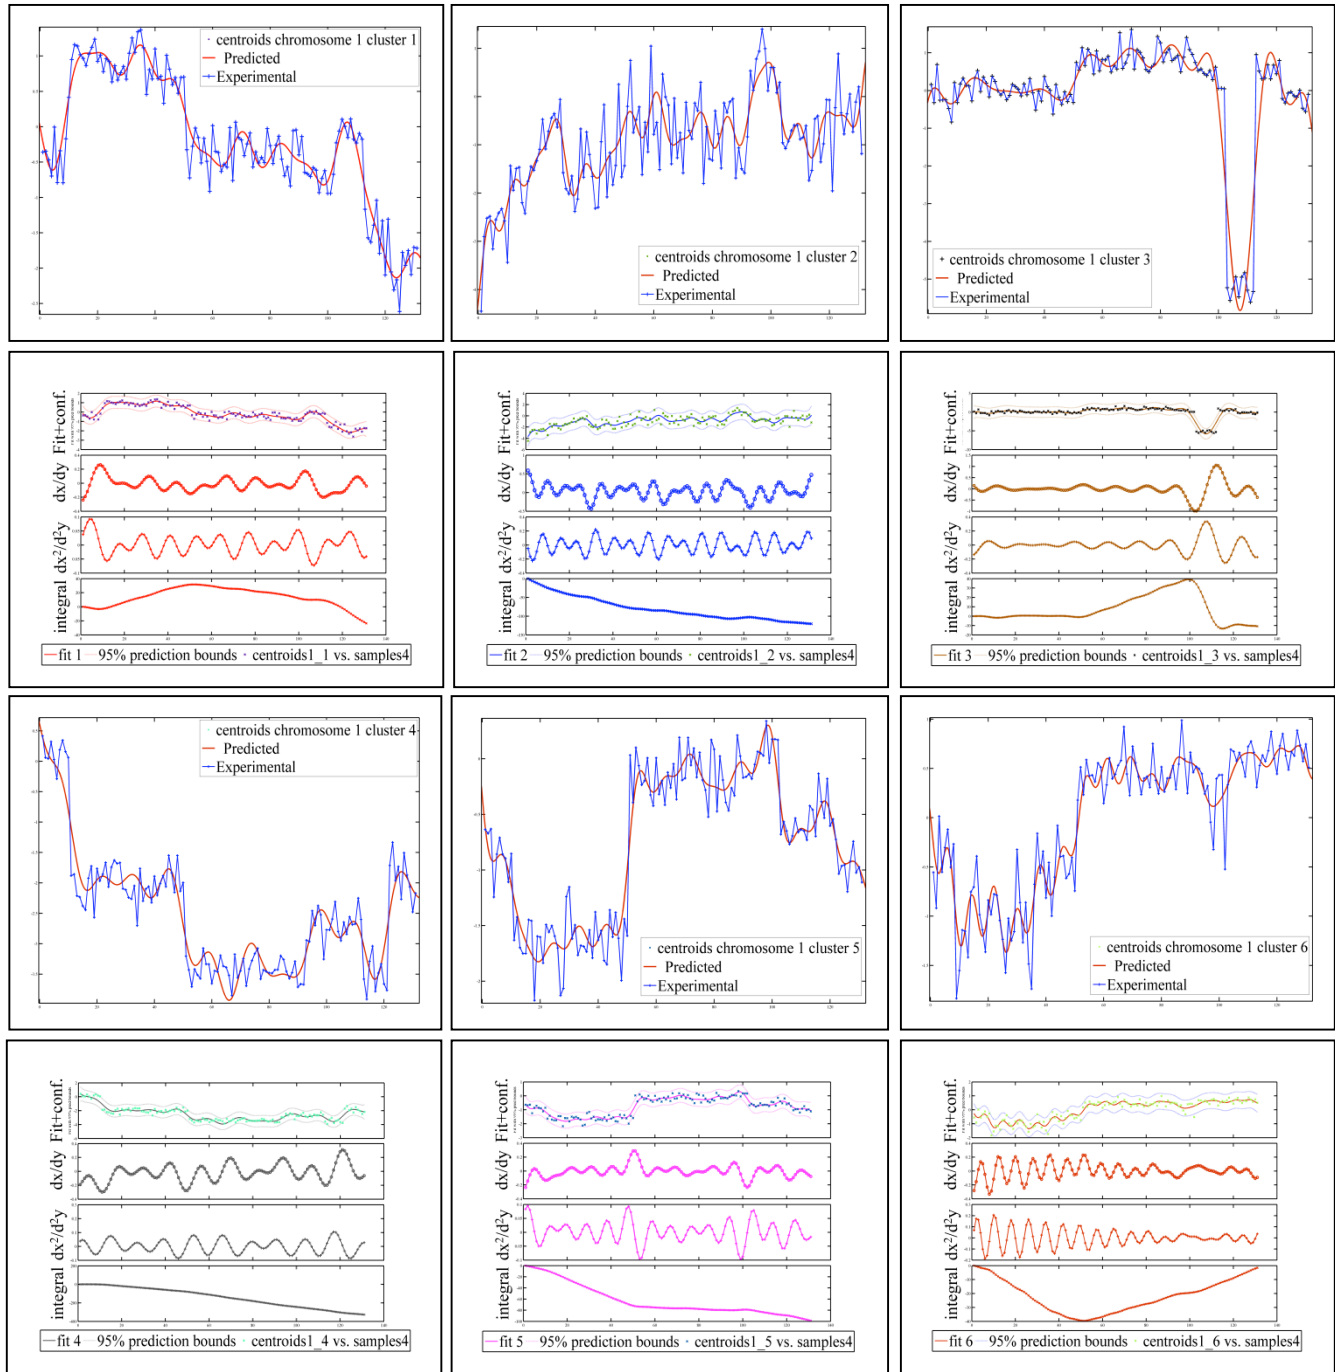

(B)

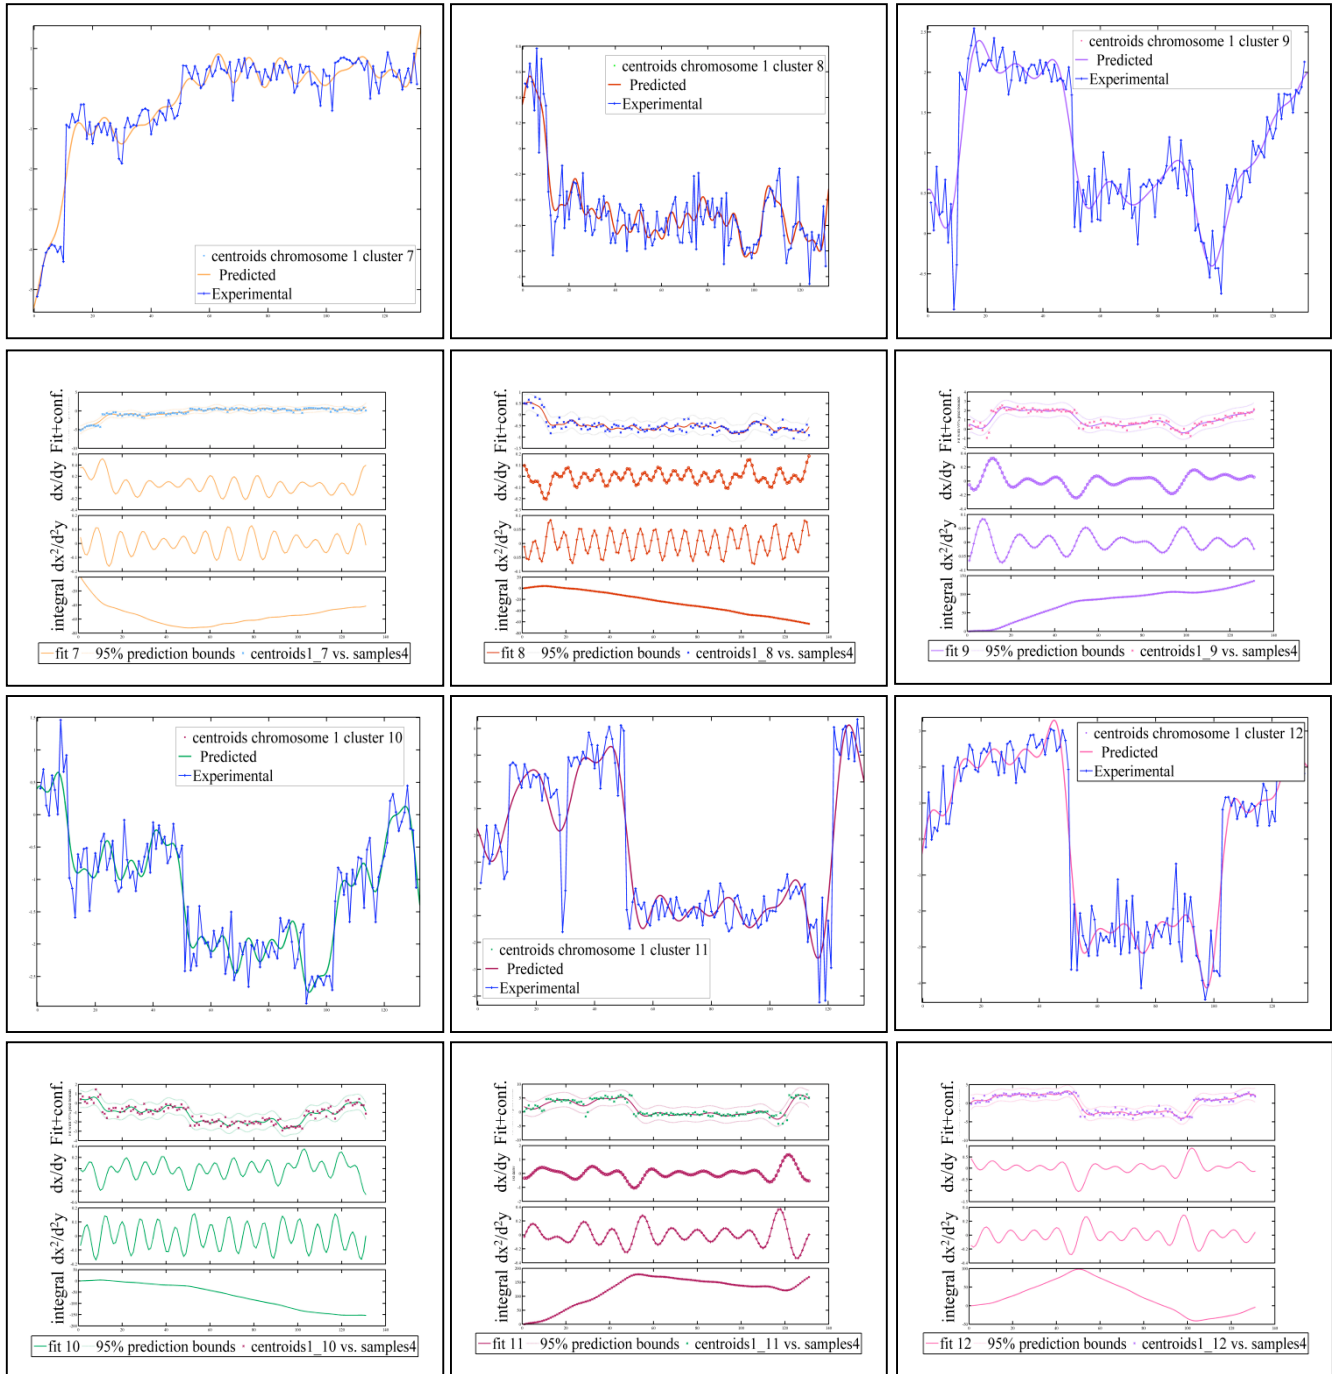



(c)

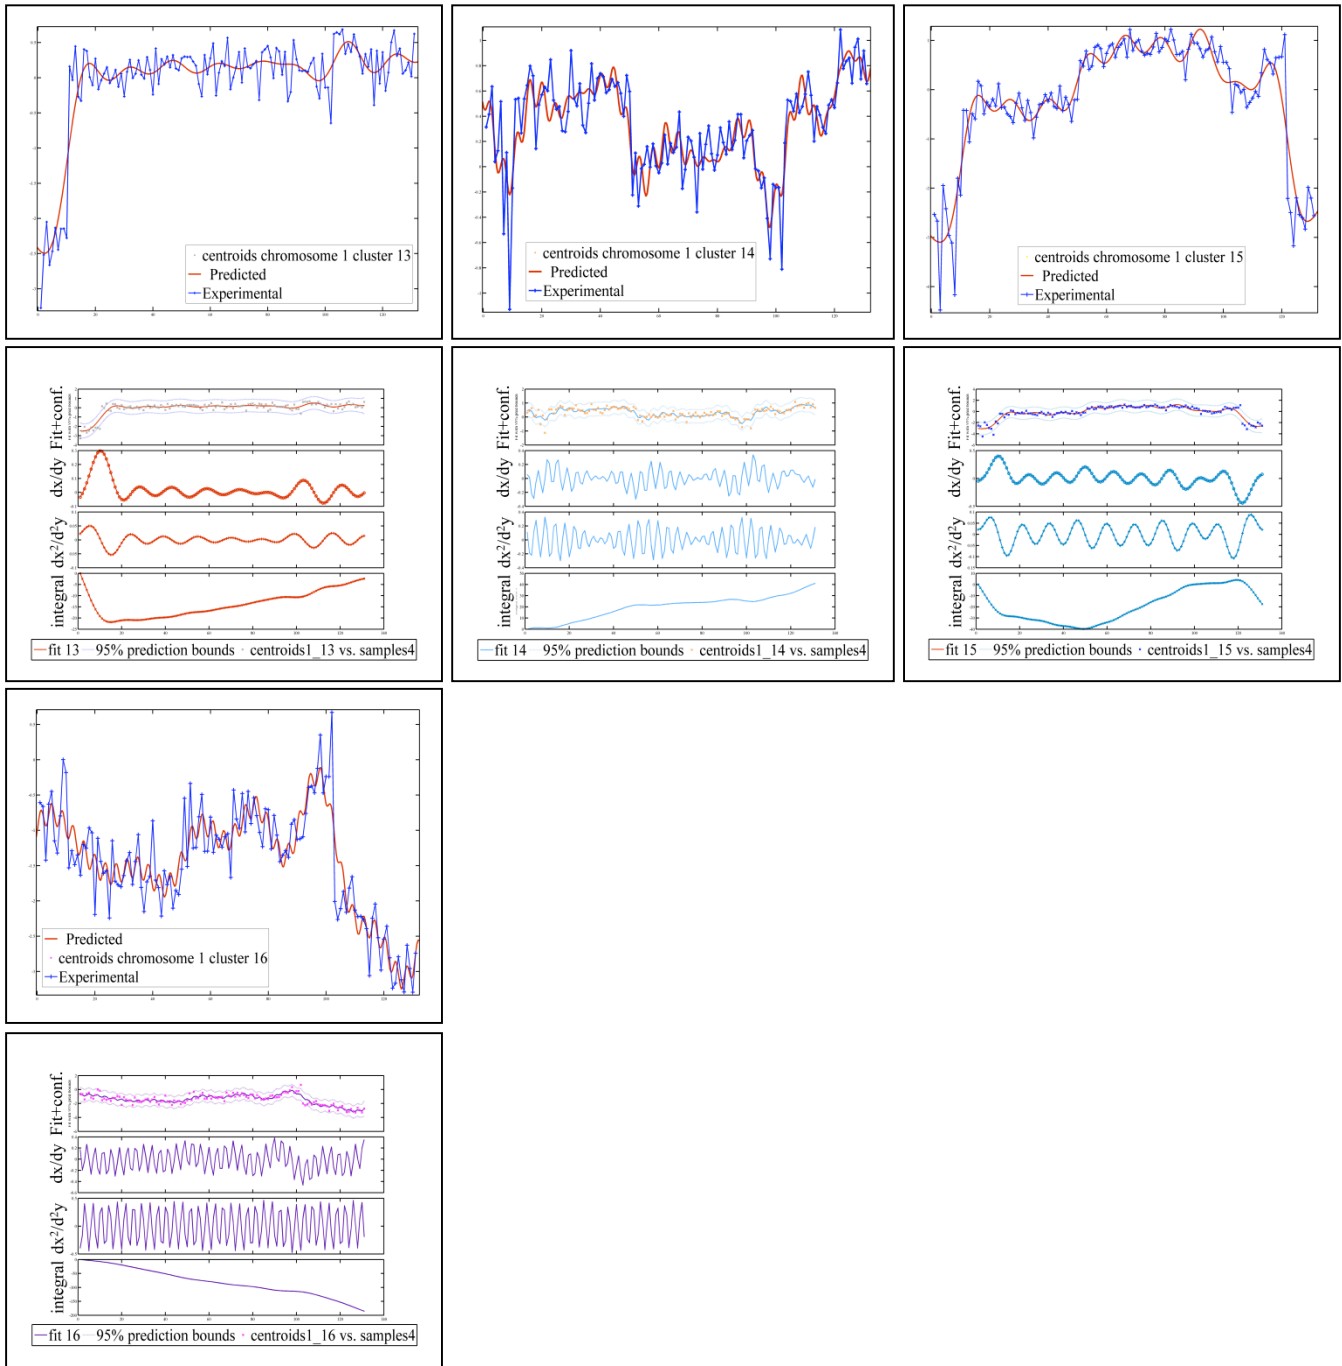

Suppl. Fig. 7

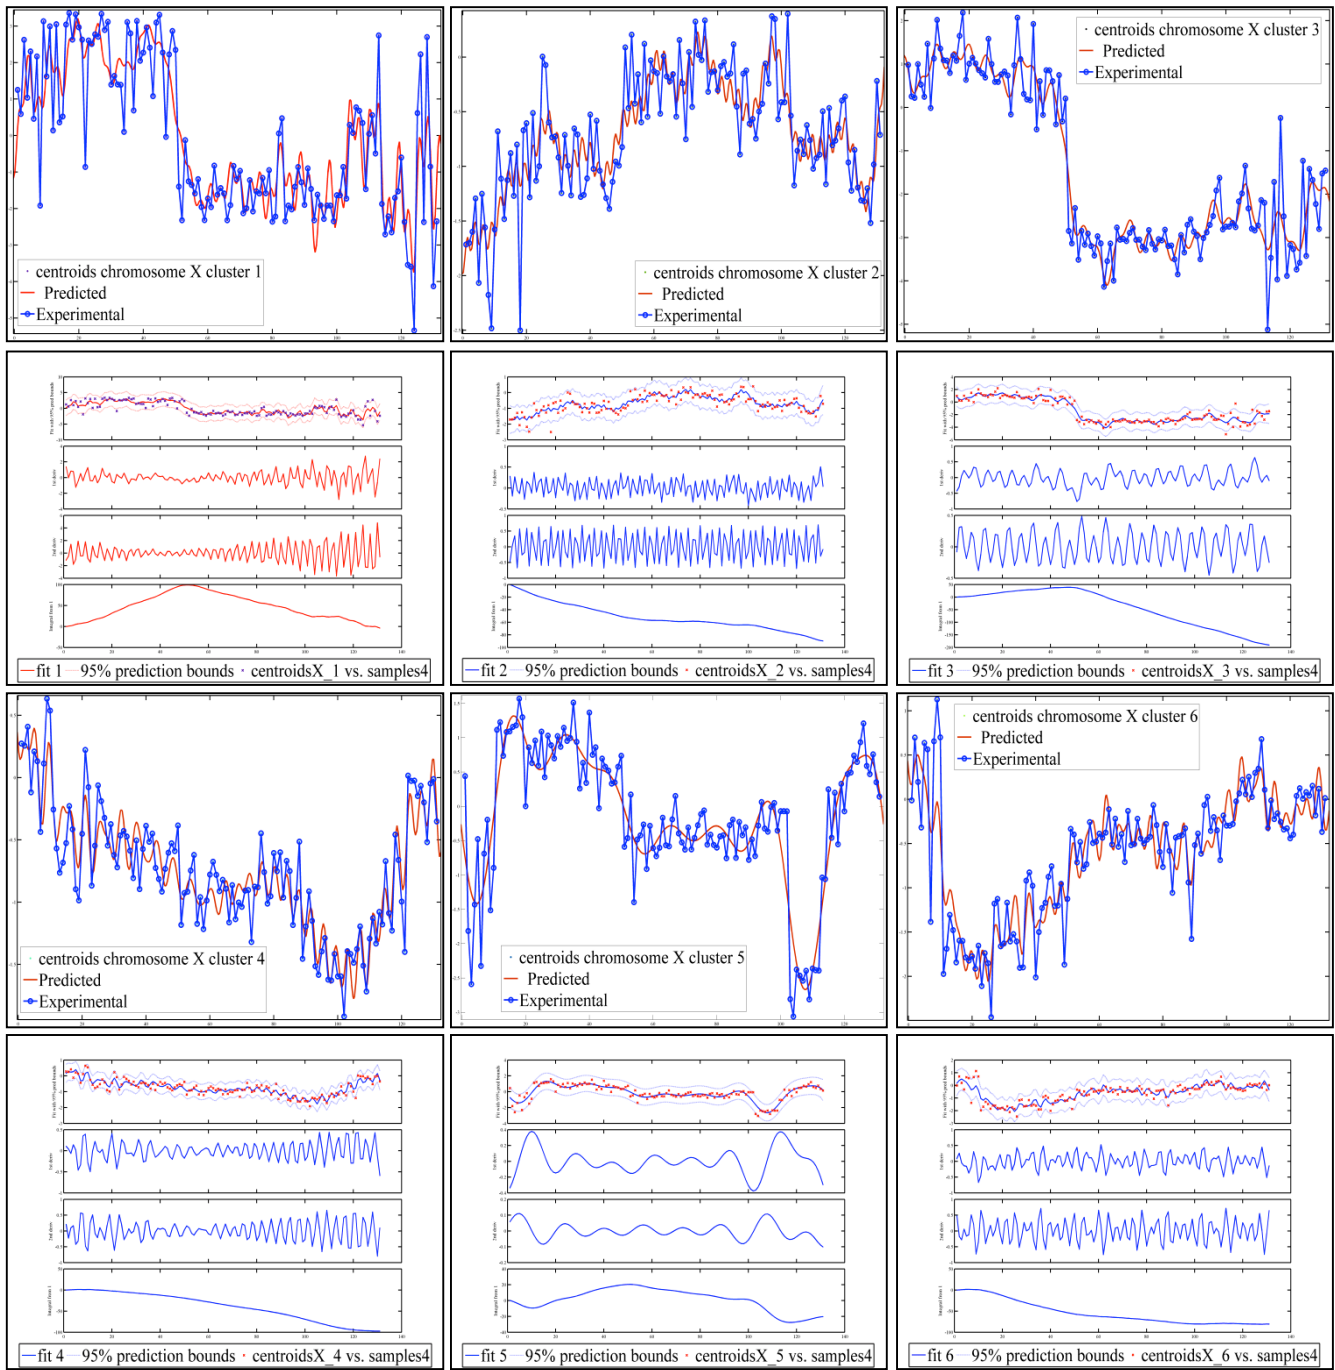

Suppl. Fig. 8

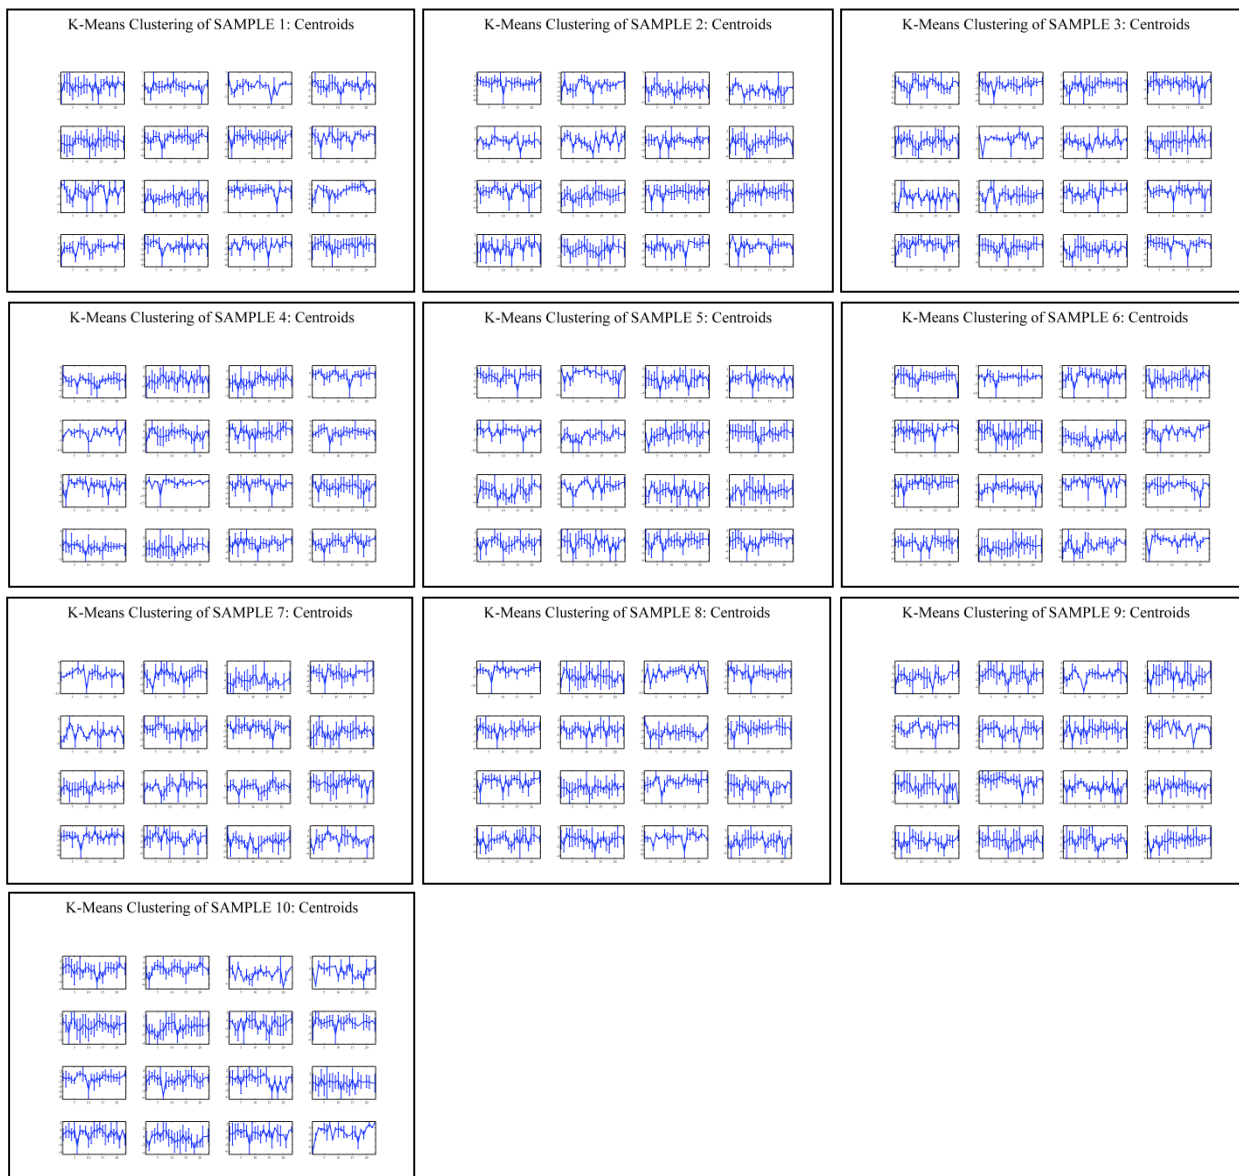

Suppl. Fig. 9

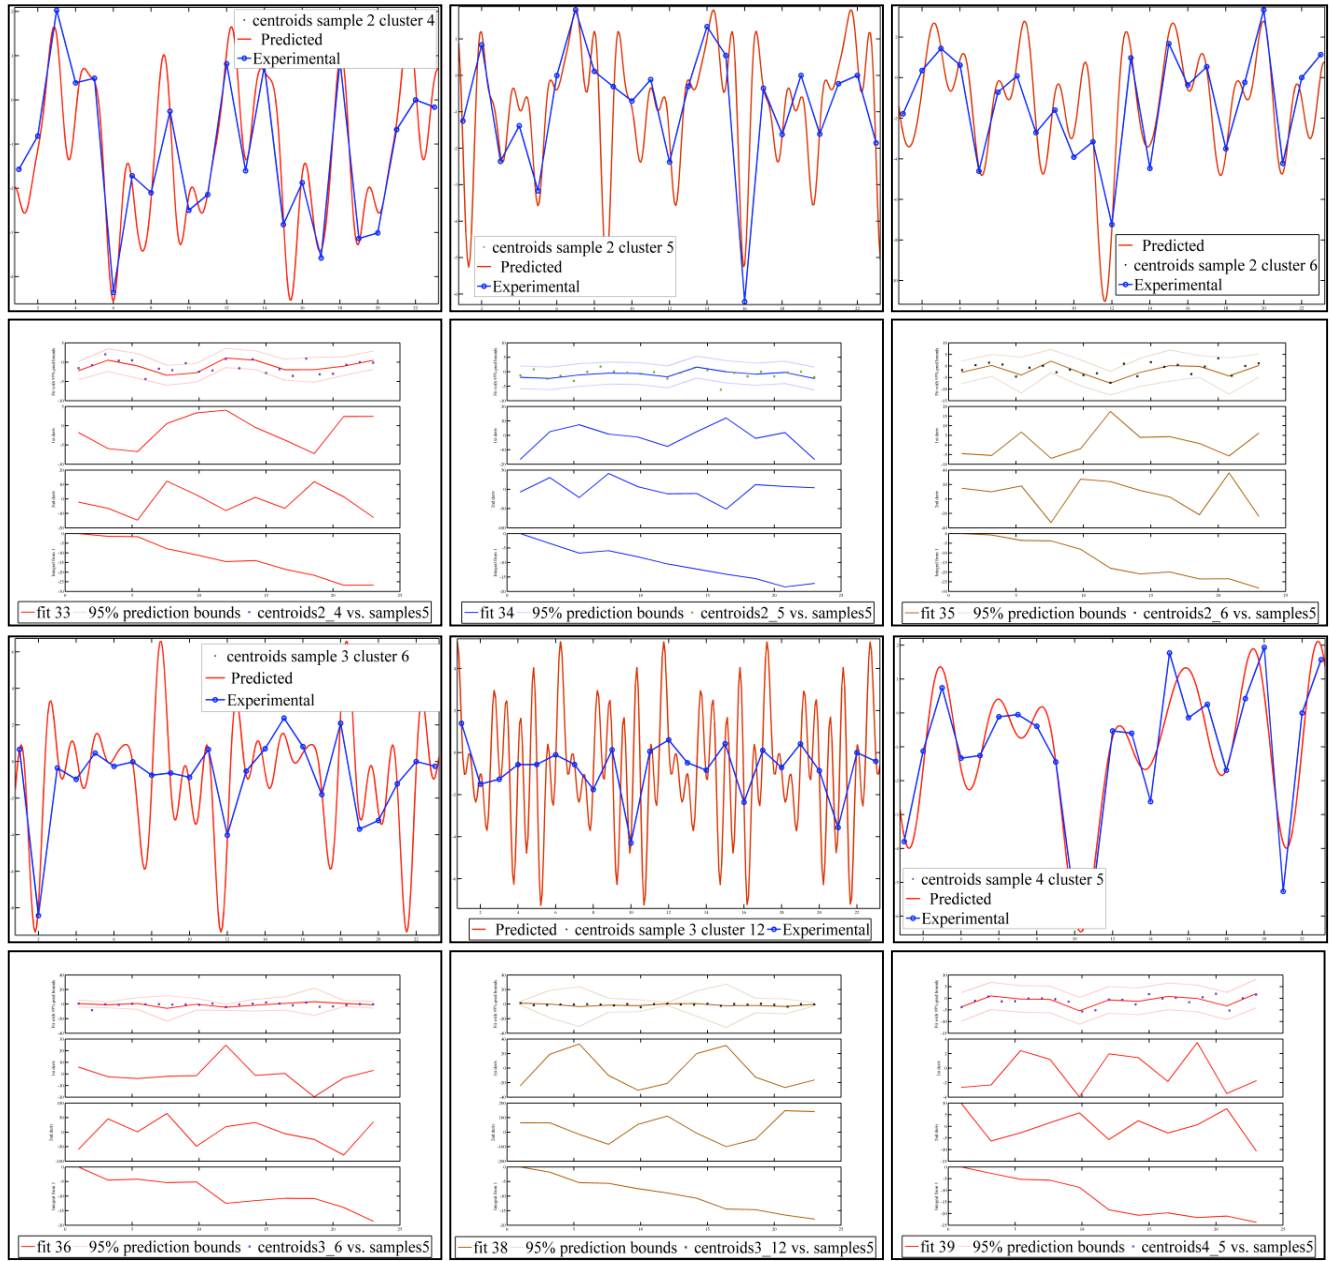

Suppl. Fig. 10

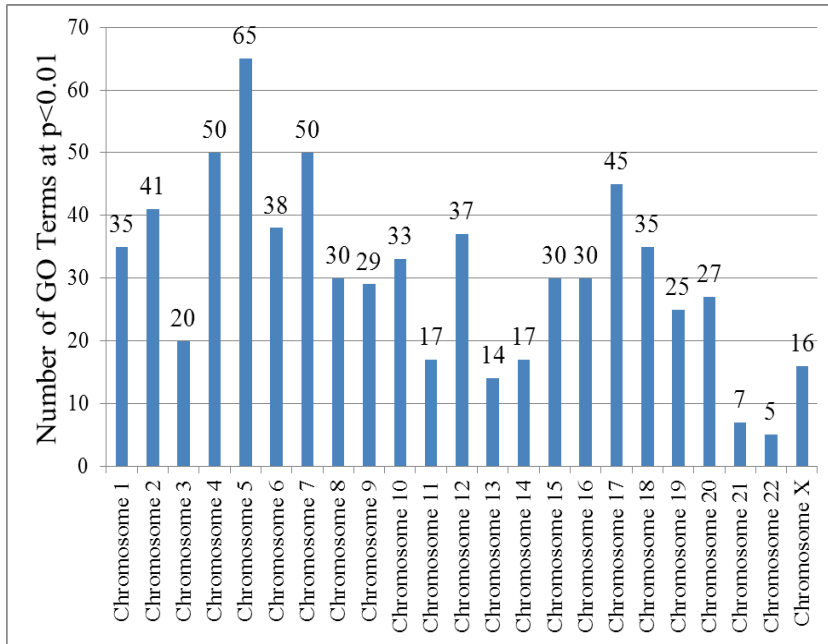

Supplement: cc-12-1544-s01.pdf [file cc-12-1544-s01.pdf]
